# Supplementary material for: PINK1 autophosphorylation upon membrane potential dissipation is essential for Parkin recruitment to damaged mitochondria
Source: PubMed Central journal article supplement — Nat Commun. 2012 Aug 21;3:1016–. doi: 10.1038/ncomms2016 (PMC3432468; doi:10.1038/ncomms2016), 2012-08-21
Supplement: ncomms2016-s1.pdf [file ncomms2016-s1.pdf]

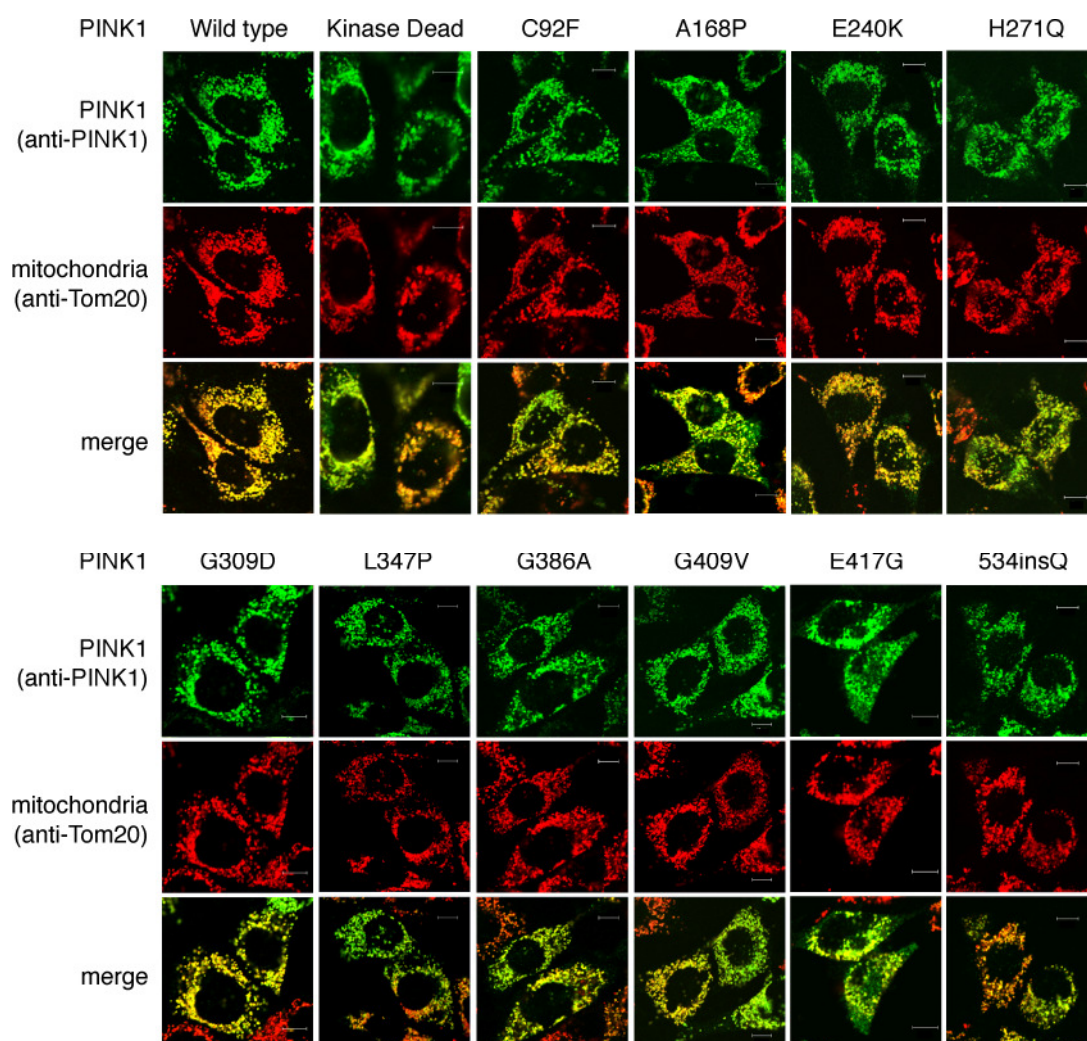

**Supplementary Figure S1. PINK1 with various pathogenic mutations localized on mitochondria.**

*PINK1*<sup>-/-</sup> MEFs expressing various pathogenic PINK1 mutants were treated with 10 μM CCCP for 1 h and then subjected to immunocytochemistry with anti-PINK1 antibody. *PINK1*<sup>-/-</sup> MEFs were used to avoid the signal derived from endogenous PINK1. Bars, 10 μm.

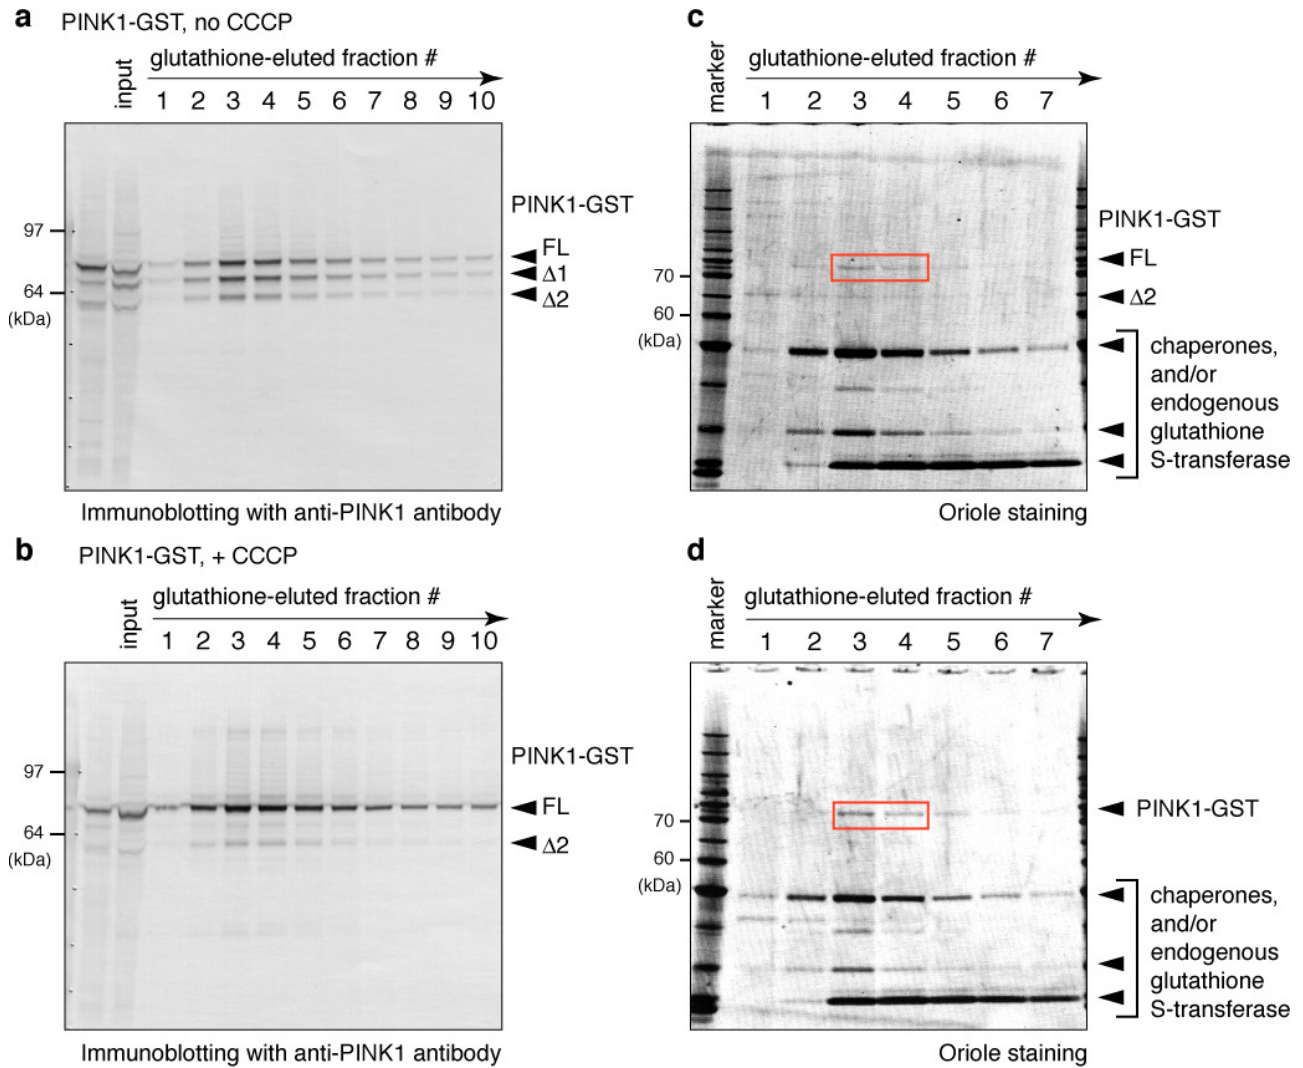

**Supplementary Figure S2. Sample collection for MS analysis.**

(a), (b) PINK1-GST was purified from HEK293 cells stably expressing PINK1-GST in the absence (a) or presence (b) of CCCP by standard purification methods. Eluates from glutathione sepharose were subjected to immunoblotting with an anti-PINK1 antibody. (c), (d) Eluates from glutathione sepharose were subjected to Oriole-staining in the absence (c) or presence (d) of CCCP. Although the yields are not optimal, the portion of the gels corresponding to PINK1-GST, which were used for MS analysis, are shown in red.

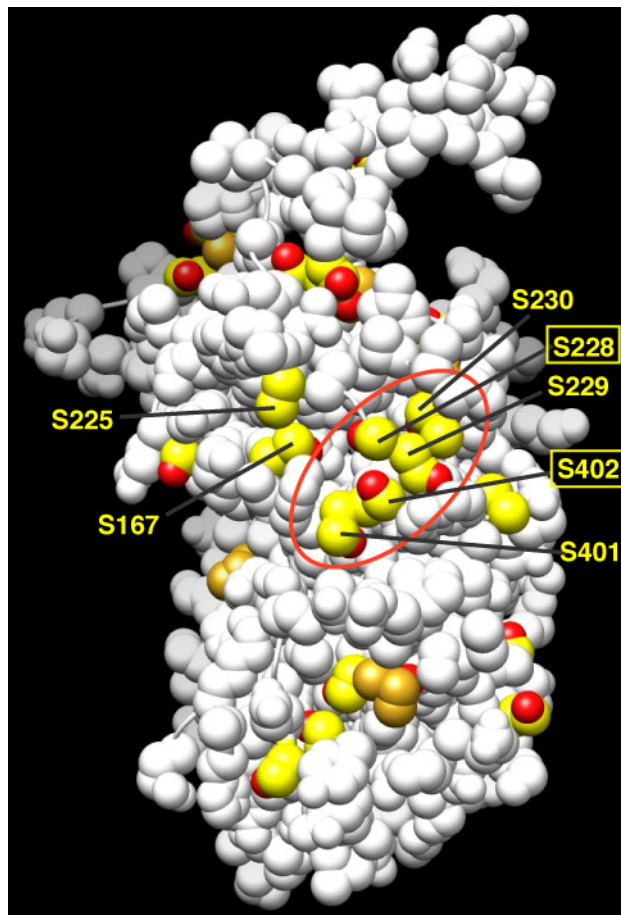

**Supplementary Figure S3. Ser residues comprise a small patch on the surface of PINK1 structural model.**

Ser228, Ser229, Ser230, Ser401 and Ser402 are spatially very close and localize to the surface of PINK1 and cluster together in a small patch. Ser and Thr residues are shown in yellow and gold, respectively, with their respective hydroxyl groups highlighted in red.

**Supplementary Table S1. List of plasmids used.**

| vector                                                                                                 | description                                     | source     |
|--------------------------------------------------------------------------------------------------------|-------------------------------------------------|------------|
| <b>Plasmids for retrovirus-mediated expression</b>                                                     |                                                 |            |
| pMXs-puro-PINK1 WT-3×Flag                                                                              | For expression of WT PINK1                      | Ref. 6     |
| pMXs-puro-PINK1 KD-3×Flag                                                                              | For expression of KD PINK1                      | Ref. 6     |
| pMXs-puro-PINK1-GST                                                                                    | For expression of PINK1-GST                     | This study |
| <b>Plasmids for transient expression of pathogenic mutants of PINK1 (mainly used in Figs. 1 and 2)</b> |                                                 |            |
| pCMV14-PINK1 WT-3×Flag                                                                                 | For expression of WT PINK1                      | Ref. 57    |
| pCMV14-PINK1 KD-3×Flag                                                                                 | For expression of KD PINK1                      | Ref. 46    |
| pCMV14-PINK1 C92F-3×Flag                                                                               | For expression of A168P PINK1                   | This study |
| pCMV14-PINK1 A168P-3×Flag                                                                              | For expression of A168P PINK1                   | This study |
| pCMV14-PINK1 E240K-3×Flag                                                                              | For expression of E240K PINK1                   | This study |
| pCMV14-PINK1 H271Q-3×Flag                                                                              | For expression of H271Q PINK1                   | Ref. 57    |
| pCMV14-PINK1 G309D-3×Flag                                                                              | For expression of G309D PINK1                   | Ref. 57    |
| pCMV14-PINK1 L347P-3×Flag                                                                              | For expression of L347P PINK1                   | Ref. 46    |
| pCMV14-PINK1 G386A -3×Flag                                                                             | For expression of G386A PINK1                   | This study |
| pCMV14-PINK1 G409V-3×Flag                                                                              | For expression of G409V PINK1                   | Ref. 46    |
| pCMV14-PINK1 E417G-3×Flag                                                                              | For expression of E417G PINK1                   | Ref. 57    |
| pCMV14-PINK1 534insQ-3×Flag                                                                            | For expression of 534insQ PINK1                 | This study |
| <b>Plasmids for transient expression of various PINK1-GFPs (used in Fig. 2)</b>                        |                                                 |            |
| pEGFP-N1-PINK1 WT-GFP                                                                                  | For expression of WT PINK1-GFP                  | This study |
| pEGFP-N1-PINK1 KD-GFP                                                                                  | For expression of KD PINK1-GFP                  | This study |
| <b>Plasmids to determine the autophosphorylation site of PINK1 (mainly used in Figs. 3 and 4)</b>      |                                                 |            |
| pcDNA3.1-non tagged PINK1 WT                                                                           | For transient expression of non-tagged WT PINK1 | Ref. 58    |
| pcDNA3.1-non tagged PINK1 S393A                                                                        | For expression of S393A PINK1                   | This study |
| pcDNA3.1-non tagged PINK1 S401A                                                                        | For expression of S401A PINK1                   | This study |
| pcDNA3.1-non tagged PINK1 S402A                                                                        | For expression of S402A PINK1                   | This study |
| pcDNA3.1-non tagged PINK1 S(393, 401)A                                                                 | For expression of S393A S401A PINK1             | This study |
| pcDNA3.1-non tagged PINK1 S(393, 402)A                                                                 | For expression of S393A S402A PINK1             | This study |
| pcDNA3.1-non tagged PINK1 S(401, 402)A                                                                 | For expression of S401A S402A PINK1             | This study |
| pcDNA3.1-non tagged PINK1 S(393,401,402)A                                                              | For expression of S393A, S401A, S402A PINK1     | This study |
| pcDNA3.1-non tagged PINK1 S167A                                                                        | For expression of S167A PINK1                   | This study |
| pcDNA3.1-non tagged PINK1 S225A                                                                        | For expression of S225A PINK1                   | This study |
| pcDNA3.1-non tagged PINK1 S228A                                                                        | For expression of S228A PINK1                   | This study |
| pcDNA3.1-non tagged PINK1 S229A                                                                        | For expression of S229A PINK1                   | This study |

|                                                                                  |                                                  |            |
|----------------------------------------------------------------------------------|--------------------------------------------------|------------|
| pcDNA3.1-non tagged PINK1 S230A                                                  | For expression of S230A PINK1                    | This study |
| pcDNA3.1-non tagged PINK1 S(225,402)A                                            | For expression of S225A S402A PINK1              | This study |
| pcDNA3.1-non tagged PINK1 S(228,402)A                                            | For expression of S228A S402A PINK1              | This study |
| pcDNA3.1-non tagged PINK1 S(229,402)A                                            | For expression of S229A S402A PINK1              | This study |
| pcDNA3.1-non tagged PINK1 S(230,402)A                                            | For expression of S230A S402A PINK1              | This study |
| Plasmids to check the significance of PINK1 autophosphorylation (used in Fig. 5) |                                                  |            |
| pCMVTNT-PINK1 WT-3HA                                                             | For strong expression of WT PINK1                | This study |
| pCMV(d1)TNT-PINK1 WT-3HA                                                         | For weak expression of WT PINK1                  | This study |
| pCMV(d1)TNT-PINK1 S(228,402)A-3HA                                                | For weak expression of S228A S402A PINK1         | This study |
| pCMV(d1)TNT-PINK1 S(228,402)D-3HA                                                | For weak expression of S228D S402D PINK1         | This study |
| Plasmids to express GFP-Parkin                                                   |                                                  |            |
| pEGFP-C1-GFP-Parkin                                                              | For transient expression of GFP-Parkin           | Ref. 6     |
| pMXs-puro-GFP-Parkin                                                             | For retrovirus-mediated expression of GFP-Parkin | Ref. 6     |

---

WT and KD mean wild-type and kinase dead, respectively.

## Supplementary References

57 Shiba, K. *et al.* Parkin stabilizes PINK1 through direct interaction. *Biochem Biophys Res Commun.* 383, 331-335, <http://dx.doi.org/10.1016/j.bbrc.2009.04.006> (2009).

58 Takatori, S. *et al.* Cytoplasmic localization and proteasomal degradation of N-terminally cleaved form of PINK1. *Neurosci Lett.* 430, 13-17, <http://dx.doi.org/10.1016/j.neulet.2007.10.019> (2008).
